1 **Original Manuscript**

2 Determinants of overweight and obesity among children between 5 to 11 years in

3 Ecuador: a secondary analysis from the National Health Survey 2018

4 Betzabé Tello<sup>1¶</sup>, José Ocaña<sup>2¶</sup>, Paúl García-Zambrano<sup>3&</sup>, Betsabé Enríque-Moreira<sup>3&</sup>,

5 Iván Dueñas-Espín<sup>2¶\*</sup>.

6 <sup>1</sup> Center for Research in Health in Latin America CISEAL, Pontificia Universidad

7 Católica del Ecuador, Quito, Ecuador

8 <sup>2</sup> Instituto de Salud Pública, Facultad de Medicina, Pontificia Universidad Católica

9 del Ecuador, Quito, Ecuador.

10 <sup>3</sup> Postgrado de Medicina Familiar, Facultad de Medicina, Pontificia Universidad

11 Católica del Ecuador, Quito, Ecuador.

12

13 \* Corresponding author:

14 E-mail: [igduenase@puce.edu.ec](mailto:igduenase@puce.edu.ec) (ID-E)

15

16 ¶These authors contributed equally to this work.

17 &These authors also contributed equally to this work.

## 18 **Abstract**

19 **Background:** During the 1990s, global eating habits changed, affecting poorer and  
20 middle-income nations, as well as richer countries. This shift, known as the "obesity  
21 transition," led to more people becoming overweight or obese worldwide. In Ecuador,  
22 this change is happening, and now, one in three children is affected by overweight or  
23 obesity (OW/OB). This study explores the links between social, economic, and  
24 demographic factors and childhood obesity in Ecuador, seeking to provide insights for  
25 shaping future health policies in response to this intricate shift.

26 **Methods:** A cross-sectional study using 2018 National Health and Nutrition Survey  
27 data from Ecuador. Weighted percentages were computed, and odds ratios for  
28 OW/OB unadjusted and adjusted for each category of explanatory variables were  
29 estimated using multilevel multivariate logistic regression models.

30 **Results:** Among 10,807 Ecuadorian school children aged 5 to 11, the prevalence of  
31 OW/OB was 36.0%. Males exhibited 1.26 times higher odds than females (95% CI:  
32 1.20 to 1.33), and each additional year of age increased the odds by 1.10 times (95%  
33 CI: 1.09 to 1.10). Economic quintiles indicated increased odds (1.17 to 1.39) from the  
34 2nd to 5th quintile (the richest) compared with the first quintile (the poorest). Larger  
35 household size slightly reduced odds of OW/OB (adjusted odds ratio [aOR]=0.93,  
36 95% CI: 0.91 to 0.95), while regular physical activity decreased odds ([aOR]=0.79,  
37 95% CI: 0.75 to 0.82). The consumption of school-provided meals showed a non-  
38 significant reduction (aOR: 0.93, 95% CI: 0.82 to 1.06). Children from families  
39 recognizing and using processed food labels had a higher likelihood of being  
40 overweight or obese (aOR=1.14, 95% CI: 1.02 to 1.26).

41 **Conclusion:** Age, male gender, and higher economic quintile increase OW/OB in  
42 Ecuadorian school children. Larger households and physical activity slightly decrease

- 43 risks. Ecuador needs policies for healthy schools and homes, focusing on health,  
44 protection, and good eating habits.

## 45 **Introduction**

46 Similar to high-income countries, low- and middle-income countries-initiated  
47 processes of nutritional and food environment transition in the 1990s. These  
48 transitions are characterized by an increase in the consumption of processed foods,  
49 edible oils, and sugary beverages, as well as a greater tendency to eat outside the  
50 home and an increased availability of ultra-processed products. All these changes  
51 have come at the expense of healthy and traditional diets. Simultaneously, the  
52 population in these countries has gradually reduced physical activity and increased  
53 sedentary behavior [1–3].

54

55 These transitions have led to a gradual increase in overweight and obesity (OW/OB)  
56 in all age groups, with a special increase in childhood OW/OB [1–4]. This global  
57 increase follows a pattern known as the "obesity transition." This pattern is  
58 characterized by a gradual shift in the burden of OW/OB from high-income to low-  
59 and middle-income countries, from wealthy households to poor ones, from urban to  
60 rural areas, and from adults to children. This changes affect several countries in Latin  
61 America [5].

62

63 Childhood obesity is a precursor to adult cardiovascular diseases and cancer [6–8].  
64 Understanding its determinants is vital for making informed public health policy  
65 decisions.

66 This study aims to identify the independent factors associated with obesity and  
67 overweight in Ecuadorian school-age children (5-11 years). By delving into  
68 obesogenic environments and contextual sociodemographic conditions, this research  
69 offers valuable territorial insights.

70 In Ecuador, the prevalence of childhood OW/OB surged by almost 5 percentage  
71 points from 2012 to 2018, reaching 35.4% [9]. This alarming increase predominantly  
72 impacts urban areas, males, those with mixed and white ethnic backgrounds, and  
73 wealthier households. Importantly, this trend extends beyond, affecting middle- and  
74 low-income households and rural populations, highlighting the urgency for a thorough  
75 exploration of its determinants [9].

76

77 While there is extensive knowledge about the social, environmental, and clinical  
78 determinants of excess malnutrition in school-age children, particularly in high-  
79 income countries [10], few countries in the region have studied these determinants  
80 [11,12]. In low- and middle-income countries such as Ecuador, there is a lack of  
81 national information regarding the determinants of childhood obesity in school-age  
82 children, except for some localized studies [13–15]. The existing knowledge gap  
83 precludes the development of effective public health policies. Despite the bulk of  
84 scientific evidence, the Ecuadorian government's efforts are not focused on  
85 improving school environments, increasing taxes on sugary beverages, or improving  
86 the labeling of processed and ultra-processed products; rather, it has reduced taxes on  
87 ultra-processed food [16]. Therefore, initiatives with proper implementation,  
88 supervision, and robust evaluations are necessary to demonstrate their impact and  
89 cost-effectiveness in school-age populations. These insights will serve as a compass  
90 for evidence-based public policies and interventions, which are crucial for combating  
91 childhood obesity in Ecuador.

92

93

94

## 95 **Materials and Methods**

### 96 **Study design:**

97 This cross-sectional study involved a secondary analysis, utilizing data from the 2018  
98 National Health and Nutrition Survey of Ecuador. To ensure methodological rigor and  
99 transparency in both the study design and dissemination of findings, compliance with  
100 the Strengthening the Reporting of Observational Studies in Epidemiology  
101 (STROBE) [17] guidelines was scrupulously maintained, as detailed in S1 Table.

### 102 **Population and sample:**

103 In our study, we included data from children encompassing sociodemographic  
104 information, anthropometric measurements, dietary habits at home and school, and  
105 physical activity status. Additionally, we integrated information about whether the  
106 children's households identified, understood, and used the nutritional traffic light  
107 labeling system for processed foods and beverages that was implemented in Ecuador.  
108 These questions were incorporated into the National Health and Nutrition Survey of  
109 2018 (see flowchart in Fig 1). We included study subjects who: (i) are  $\geq 5$  years old or  
110  $\leq 11$  years old; (ii) had complete anthropometric information, and (iii) had complete  
111 data regarding age, ethnicity, economic quintile, schooling characteristics, dietary

112 habits, and physical activity.

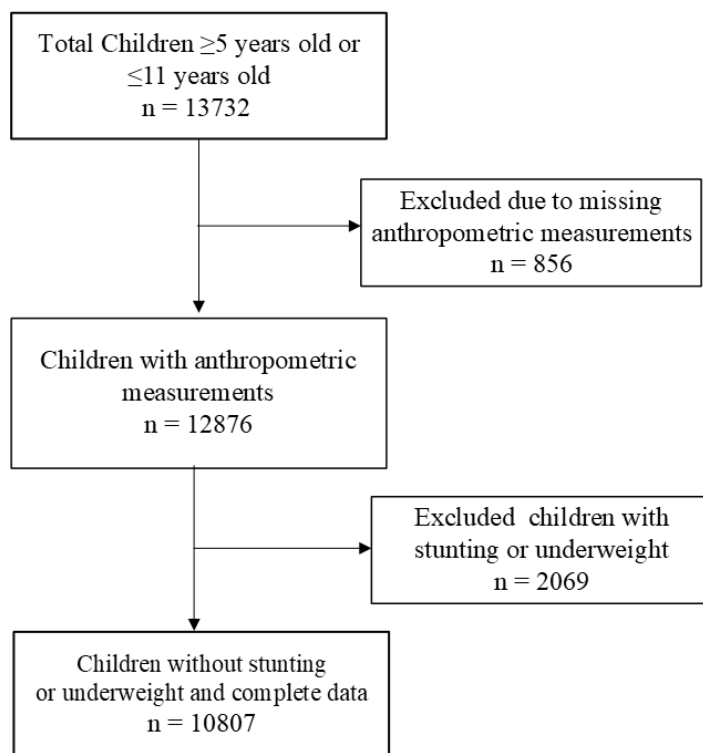

113 Fig 1. Flowchart showing the study population and selection of study participants

113

## 114 **The ENSANUT 2018 survey**

115 The Ecuadorian National Health and Nutrition Survey 2018 (ENSANUT 2018, for its  
116 acronym in Spanish) was a cross-sectional study conducted in 2018 that involved  
117 nationally representative samples from the Ecuadorian population [18].

118

119 In the ENSANUT 2018 study, a two-stage sampling strategy was employed to secure  
120 a representative sample of the Ecuadorian populace. Initially, Primary Sampling Units  
121 (PSU) were chosen through stratified sampling, incorporating proportional probability  
122 to size. Subsequently, an average of 18 households per PSU were randomly selected  
123 for investigation. Within these households, targeted demographic groups were  
124 identified, including children under 5 years, women aged 12 to 49, men aged over 12  
125 years, and individuals between 5 and 17 years. For households with children aged 5 to

126 11 years, one individual between 5 and 17 years was selected for interview and  
127 subjected to a specialized questionnaire. Anthropometric measurements were  
128 obtained. The abovementioned sampling approach ensured the data quality and  
129 representativeness of the study. Further information on the methodology, datasets, and  
130 findings of ENSANUT 2018 is available at:  
131 <https://www.ecuadorencifras.gob.ec/institucional/home/>.

### 132 **Measurements:**

133 We used the information that the survey collected about sex, age of the child,  
134 ethnicity, education of the children, economic quintile, regular class attendance,  
135 geographical regions of Ecuador, receiving the human developing bonus (BDH, for its  
136 acronym in Spanish), number of people in the household, disposal of excreta, physical  
137 activity, perception of consumption of vegetables, consumption of fast food, days per  
138 week of school food consumption, buying food at school, consumption of the food  
139 provided by the school, recognizing, understanding, and using the nutritional traffic  
140 light labelling of processed foods; and, consumption of processed foods with a red  
141 label. The Ecuadorian Nutritional Traffic Light Labelling system uses three colours -  
142 red, yellow, and green - to indicate the levels of sugar, fat, and salt in processed foods.  
143 Red signifies high concentrations, yellow denotes medium levels, and green indicates  
144 low content [19]. This system empowers consumers to make healthier food choices.

### 145 **Main outcome:**

146 The main outcome variable was, overweight or obesity. The World Health  
147 Organization (WHO) macro program Stata (WHO AnthroPlus) was used to establish  
148 the nutritional status of children based on WHO 2007 standards for the classification  
149 of children as overweight or obese between 5 and 19 years. Overweight was defined  
150 as a Body-Mass-Index (BMI)-for-age greater than 1 standard deviation above the



151 WHO Growth Reference median; and obesity as a greater than 2 standard deviations  
152 above the WHO Growth Reference median [20].

### 153 **Statistical analyses and sample considerations:**

154 A priori, we calculated that a sample of 9759 individuals is enough to estimate, with  
155 95% confidence and an accuracy of +/- 1 percentage units, a population percentage  
156 that will predictably be around 35.38% [9]. The percentage of necessary replacements  
157 is expected to be 10%.

158 In the analysis, the 'svy' command from Stata 16.1 (StataCorp. 2019. Stata Statistical  
159 Software: Release 16. College Station, TX: StataCorp LLC.) was employed to  
160 accommodate the expansion factors inherent in the survey design. This methodology  
161 yield estimates that faithfully represent the complex nature of the survey's structure.  
162 Descriptive statistics for complex survey data involved calculating weighted  
163 percentages for categorical variables and deriving means and standard errors for  
164 discrete ones. Subsequently, the characteristics of non-overweight or obese children  
165 were compared with those of overweight or obese children, adhering to the same 'svy'  
166 command approach.

167 Then, multilevel logistic regression models were built to analyze the relationships  
168 between the explanatory variables and the outcome. We estimated crude and adjusted  
169 odds ratios (OR and aOR) of OW/OB for each explanatory variable and/or their  
170 categories. In that sense, we built multilevel multivariate logistic regression models to  
171 evaluate the independent association between each explanatory variable and health  
172 self-perception. The multilevel variable was geographical region, considering that  
173 there are important differences in OW/OB across those regions. Moreover, expansion  
174 factors were used to align estimates with the stratified sampling method and primary  
175 sampling units, managing variability and correlations within groups.

176 We built a saturated model that included all the individual covariates. Then, based on  
177 the researchers' criteria, we eliminated covariates with  $p > 0.25$  from significant  
178 covariates that were retained in the model [21]. Confidence intervals (95%CI) of the  
179 adjusted and unadjusted ORs and their corresponding p-values were calculated. Once  
180 the parsimonious model was obtained, we compared both models and chose the  
181 "final" model, according to its level of significance from the likelihood ratio test. The  
182 final model was stratified by sex. Given the small number of missing data (there were  
183 missing values in <1% of the whole database), we employed complete case analysis  
184 to estimate statistical associations.  
185 To test for potential effect modification, we performed several secondary analyses to  
186 assess the sensitivity of our estimates with our assumptions regarding biases, and to  
187 test for model misspecifications. We ran the final model excluding: (i) children  
188 categorized in the highest income quintile, (ii) children whose parents received the  
189 BDH, and (iii) children within the upper third of the highest number of people per  
190 household.

## 191 **Ethical issues:**

192 The research protocol was thoroughly reviewed and approved by the Ethics  
193 Subcommittee for Research in Human Beings of the Faculty of Medicine of the  
194 Pontifical Catholic University of Ecuador under the code SB-CEISH-POS-691. The  
195 committee determined that informed consent was not required for this study.

196

## 197 **Results**

198 A comprehensive demographic and health snapshot of children aged 5 to 11 years is  
199 presented in Table 1. In the study sample comprising 10807 children aged 5 to 11

200 from Ecuador, it was found that the mean age of the children was 8.0 years (standard  
 201 error [SE]: 0.03). About ethnicity, Mestizo (mixed ethnic background) children were  
 202 predominant, making up 80.8% of the sample. When stratified by economic quintiles,  
 203 approximately a quarter of the children (25.4%) belonged to the lowest income  
 204 quintile. Educationally, it was noted that the vast majority (98.3%) were currently  
 205 attending elementary school. Regarding dietary habits, a significant proportion of the  
 206 sample (64.3%) reported consuming food provided by the school, and nearly half  
 207 (48.4%) indicated a reduction in the consumption of processed foods with a red label.  
 208 Notably, 36.0% of the children were identified as being overweight or obese,  
 209 according to the Body Mass Index (BMI) adjusted for age and sex, using the WHO  
 210 Growth References.

211 **Table 1. Description of the sample.**

| Variable                                                                              | Whole sample<br>(n= 10807)<br>No. | Weighted<br>percentage or<br>mean (SE) |
|---------------------------------------------------------------------------------------|-----------------------------------|----------------------------------------|
| Sex (Male)                                                                            | 5541                              | 50.3                                   |
| Age of the children                                                                   | 10807                             | 8.0 (0.03)                             |
| Ethnicity                                                                             |                                   |                                        |
| Ethnicity (Indigenous)                                                                | 1252                              | 7.2                                    |
| Ethnicity (Afroecuadorian)                                                            | 459                               | 4.8                                    |
| Ethnicity (Mestizo-mixed ethnic background)                                           | 8536                              | 80.8                                   |
| Ethnicity (White)                                                                     | 141                               | 1.3                                    |
| Ethnicity (Montubio or other)                                                         | 419                               | 5.9                                    |
| Economic quintiles by income <sup>a</sup>                                             |                                   |                                        |
| Economic quintile by income (1st quintile)                                            | 2865                              | 25.4                                   |
| Economic quintile by income (2nd quintile)                                            | 2344                              | 23.6                                   |
| Economic quintile by income (3rd quintile)                                            | 2096                              | 20.4                                   |
| Economic quintile by income (4th quintile)                                            | 1767                              | 16.7                                   |
| Economic quintile by income (5th quintile)                                            | 1608                              | 13.9                                   |
| Education of children (Elementary school ongoing)                                     | 10618                             | 98.3                                   |
| Regular class attendance (Yes)                                                        | 10764                             | 99.6                                   |
| The head of the household receives the BDH (Yes)                                      | 455                               | 4.4                                    |
| Number of people in the household                                                     | 10807                             | 5.0 (0.03)                             |
| Inadequate disposal of excreta (Yes)                                                  | 2570                              | 24.1                                   |
| Regular physical activity (Yes)                                                       | 1389                              | 13.5                                   |
| Perception of low consumption of vegetables (Yes)                                     | 5218                              | 47.1                                   |
| Days per week of consumption in fast food restaurants                                 | 10807                             | 0.9 (0.02)                             |
| Days per week of school food consumption                                              | 7930                              | 4.4 (0.03)                             |
| The child buys food at school (Yes)                                                   | 7271                              | 64.1                                   |
| The child eats the food provided by the school (Yes)                                  | 7103                              | 64.3                                   |
| Family members recognize, understand, and use the labeling of processed foods (Yes)   | 6635                              | 65.4                                   |
| In the family, they reduced the consumption of processed foods with a red label (Yes) | 4256                              | 48.4                                   |
| Overweight or obesity <sup>b</sup>                                                    | 3931                              | 36.0                                   |

BDH=Human Development Voucher, by its Spanish spelling.

SE= Standard error.

<sup>a</sup> Income quintiles are calculated at the household level using monetary labour income per capita, first calculating the total income for each income earner. This total income includes earnings from work, income from investments, transfers, and other benefits, such as cash social transfers. Once we add all these up, we obtain the total household income. Then, we determine the average income per person (per capita income) by dividing the total household income by the number of people in each household. Subsequently, the population is systematically arranged on the basis of the per capita income variable. The calculation of the quintiles was performed by dividing the population into five equal groups, known as quintiles. The first quintile includes the percentage of households with the lowest income, the second quintile includes the next percentage, and so on until the fifth quintile, which includes the percentage of households with the highest income.

<sup>b</sup> Overweight and obesity were determined by calculating the Body Mass Index (BMI), adjusted for age and sex, according to the WHO growth references. Overweight is BMI-for-age greater than 1 standard deviation above the WHO Growth Reference median; and obesity is greater than 2 standard deviations above the WHO Growth Reference median.

212

213 We found distinct differences between non-overweight or non-obese children and  
214 their overweight or obese counterparts (S2 Table). In a comparison of characteristics  
215 between non-overweight/non-obese children (n=6876) and those identified as  
216 overweight or obese (n=3931) the mean age of overweight or obese children was  
217 slightly higher at 8.3 years (SE: 0.05) compared to 7.9 years (SE: 0.04) for their non-  
218 overweight counterparts. Ethnic distribution showed that 81.7% of the overweight or  
219 obese groups were Mestizo (mixed ethnic background), compared with 80.3% in the  
220 non-overweight group. Economic stratification revealed that children from the lowest  
221 income quintile were less represented (20.6%) among the overweight or obese  
222 compared to those non-overweight (28.2%). Furthermore, a greater proportion of  
223 overweight or obese children (65.7%) consumed food provided by the school, in  
224 contrast to 63.2% of the non-overweight children. Finally, a difference was detected  
225 in the perception of reduced consumption of processed foods with a red label, with  
226 50.4% of overweight or obese children indicating consumption, compared to 47.2% of  
227 their non-overweight peers.

228 After running multivariate logistic regression models, we found that, several factors  
229 were significantly associated with childhood overweight and obesity (Table 2).

230 According to the final adjusted model, several variables exhibited statistically  
231 significant associations between several explanatory variables and being overweight  
232 or obese. Notably, male children exhibited a higher likelihood of being OW/OB, with

233 1.26 times increased adjusted odds (95% CI: 1.20 to 1.33) compared to female  
234 children. In addition, for every yearly increase in a child's age, the odds of being  
235 overweight or obese increased by 1.10 times (95% CI: 1.09 to 1.10). When broken  
236 down by ethnicity, compared to Indigenous children, the Afroecuadorian ethnicity  
237 presented a slightly elevated but not statistically significant odds of 1.12 (95% CI:  
238 0.99 to 1.26), while Mestizo children showed 1.14 times increased odds (95% CI:  
239 1.04 to 1.25). White children and those from Montubio (mixed ethnic background of  
240 coastal Ecuador) or other ethnicities did not demonstrate statistically significant  
241 differences in this model. When considering economic quintiles by income, children  
242 in the 2nd quintile demonstrated 1.17 times higher odds (95% CI: 1.07 to 1.31), those  
243 in the 3rd quintile showed 1.33 times (95% CI: 1.11 to 1.59), in the 4th quintile it was  
244 1.39 times (95% CI: 1.18 to 1.65), and in the 5th quintile, the odds were 1.39 times  
245 higher (95% CI: 1.29 to 1.51) compared to those in the 1st quintile. An increase in the  
246 number of household members corresponded to a slight reduction in odds by 0.93  
247 times for each additional person (95% CI: 0.91 to 0.95). Moreover, children with  
248 inadequate disposal of excreta exhibited 0.82 times lower odds of being overweight or  
249 obese (95% CI: 0.76 to 0.90). Similarly, regular physical activity was associated with  
250 reduced odds, at 0.79 times (95% CI: 0.75 to 0.82). Interestingly, children from  
251 families that recognized and used processed food labels exhibited a higher likelihood  
252 of being overweight or obese, with an adjusted odds ratio (aOR) of 1.14 (95% CI:  
253 1.02 to 1.26). Conversely, the consumption of food provided by schools was linked  
254 with a non-significant reduction in the risk of overweight or obesity, with an aOR of  
255 0.93 (95% CI: 0.82 to 1.06).

**Table 2. Crude and adjusted Odds Ratios of overweight or obesity from each explanatory variable using multilevel and logistic regression models.**

| Variable                                                                                                | Crude models        |         | Adjusted models       |         |                          |         |
|---------------------------------------------------------------------------------------------------------|---------------------|---------|-----------------------|---------|--------------------------|---------|
|                                                                                                         | OR (IC95%)          | p-value | Saturated aOR (IC95%) | p-value | Parsimonious aOR (IC95%) | p-value |
| Male sex (female is the ref.)                                                                           | 1.24 (1.18 to 1.31) | <0.001  | 1.23 (1.08 to 1.40)   | 0.002   | 1.26 (1.20 to 1.33)      | <0.001  |
| Age of the child (per each increase in one year)                                                        | 1.10 (1.08 to 1.12) | <0.001  | 1.09 (1.08 to 1.10)   | <0.001  | 1.10 (1.09 to 1.10)      | <0.01   |
| Ethnicity                                                                                               |                     |         |                       |         |                          |         |
| Ethnicity (Indigenous is the ref.)                                                                      | 1                   | -       | 1                     | -       | 1                        | -       |
| Ethnicity (Afroecuadorian)                                                                              | 1.09 (0.90 to 1.32) | 0.381   | 0.99 (0.86 to 1.15)   | 0.917   | 1.12 (0.99 to 1.26)      | 0.062   |
| Ethnicity (Mestizo - mixed ethnic background)                                                           | 1.25 (1.06 to 1.49) | 0.009   | 1.06 (0.88 to 1.27)   | 0.560   | 1.14 (1.04 to 1.25)      | 0.004   |
| Ethnicity (White)                                                                                       | 1.39 (1.05 to 1.85) | 0.021   | 1.17 (0.80 to 1.71)   | 0.412   | 1.26 (0.95 to 1.67)      | 0.114   |
| Ethnicity (Montubio or other)                                                                           | 1.01 (0.83 to 1.24) | 0.903   | 0.82 (0.76 to 0.89)   | <0.001  | 0.97 (0.83 to 1.14)      | 0.718   |
| Basic education of the children (no formal education is the ref.)                                       | 2.52 (0.69 to 9.18) | 0.160   | 0.82 (0.50 to 1.35)   | 0.433   |                          |         |
| Economic quintiles by income <sup>a</sup>                                                               |                     |         |                       |         |                          |         |
| Economic quintile by income (1st quintile is the ref.)                                                  | 1                   | -       | 1                     | -       | 1                        | -       |
| Economic quintile by income (2nd quintile)                                                              | 1.21 (1.14 to 1.29) | <0.001  | 1.13 (1.07 to 1.19)   | <0.001  | 1.17 (1.12 to 1.21)      | <0.001  |
| Economic quintile by income (3rd quintile)                                                              | 1.47 (1.24 to 1.75) | <0.001  | 1.32 (1.05 to 1.64)   | 0.015   | 1.33 (1.11 to 1.59)      | 0.002   |
| Economic quintile by income (4th quintile)                                                              | 1.59 (1.36 to 1.86) | <0.001  | 1.34 (1.10 to 1.63)   | 0.004   | 1.39 (1.18 to 1.65)      | <0.001  |
| Economic quintile by income (5th quintile)                                                              | 1.67 (1.50 to 1.85) | <0.001  | 1.41 (1.19 to 1.67)   | <0.001  | 1.39 (1.29 to 1.51)      | <0.001  |
| p-for-trend                                                                                             | 1.15 (1.10 to 1.19) | <0.001  | 1.09 (1.05 to 1.14)   | <0.001  | 1.09 (1.05 to 1.14)      | <0.001  |
| Regular class attendance (otherwise is the ref)                                                         | 1.48 (0.94 to 2.34) | 0.091   | 0.67 (0.26 to 1.71)   | 0.403   | -                        | -       |
| The head of the household receives the BDH (otherwise is the ref.)                                      | 0.77 (0.74 to 0.81) | <0.001  | 0.97 (0.86 to 1.08)   | 0.563   | -                        | -       |
| Number of people in the household (per each extra person)                                               | 0.92 (0.91 to 0.93) | <0.001  | 0.94 (0.91 to 0.97)   | <0.001  | 0.93 (0.91 to 0.95)      | <0.001  |
| Inadequate disposal of excreta (otherwise is the ref.)                                                  | 0.73 (0.68 to 0.78) | <0.001  | 0.87 (0.75 to 1.00)   | 0.058   | 0.82 (0.76 to 0.90)      | <0.001  |
| Regular physical activity (otherwise is the ref.)                                                       | 0.76 (0.75 to 0.78) | <0.001  | 0.77 (0.76 to 0.78)   | <0.001  | 0.79 (0.75 to 0.82)      | <0.001  |
| Perception of low consumption of vegetables (otherwise is the ref.)                                     | 0.91 (0.79 to 1.05) | 0.196   | 1.01 (0.91 to 1.13)   | 0.824   | -                        | -       |
| Days per week of consumption in fast food restaurants (per each extra day of consumption)               | 1.05 (1.03 to 1.07) | <0.001  | 1.01 (0.96 to 1.06)   | 0.810   | -                        | -       |
| Days per week of school food consumption (per each extra day of consumption)                            | 0.98 (0.94 to 1.02) | 0.318   | 0.99 (0.93 to 1.06)   | 0.751   | -                        | -       |
| The child buys food at school (otherwise is the ref.)                                                   | 1.17 (0.95 to 1.44) | 0.139   | 1.10 (0.90 to 1.36)   | 0.349   | -                        | -       |
| Consumption of food provided by the school (otherwise is the ref.)                                      | 0.83 (0.73 to 0.95) | 0.007   | 0.82 (0.74 to 0.90)   | <0.001  | 0.93 (0.82 to 1.06)      | 0.288   |
| Family members recognize, understand, and use the labeling of processed foods (otherwise is the ref.)   | 1.24 (1.14 to 1.35) | <0.001  | 1.14 (1.09 to 1.19)   | <0.001  | 1.14 (1.02 to 1.26)      | 0.019   |
| In the family, they reduced the consumption of processed foods with a red label (otherwise is the ref.) | 1.14 (1.10 to 1.18) | <0.001  | 1.08 (0.94 to 1.25)   | 0.260   | -                        | -       |
| BDH=Human Development Voucher, by its Spanish spelling                                                  |                     |         |                       |         |                          |         |

<sup>a</sup> Income quintiles are calculated at the household level using monetary labour income per capita, first calculating the total income for each income earner. This total income includes earnings from work, income from investments, transfers, and other benefits, such as cash social transfers. Once we add all these up, we obtain the total household income. Then, we determine the average income per person (per capita income) by dividing the total household income by the number of people in each household. Subsequently, the population is systematically arranged on the basis of the per capita income variable. The calculation of the quintiles was performed by dividing the population into five equal groups, known as quintiles. The first quintile includes the percentage of households with the lowest income, the second quintile includes the next percentage, and so on until the fifth quintile, which includes the percentage of households with the highest income.

258 In analyzing the determinants of overweight and obesity in children, notable  
259 differences emerged between genders when running the final parsimonious model  
260 (Table 3). For each incremental year in age, a significant association with overweight  
261 or obesity was noted in both genders, with the odds of being overweight or obese  
262 increasing by an adjusted odds ratio (aOR) of 1.09 (95% CI: 1.07 to 1.11) for women  
263 and 1.10 (95% CI: 1.09 to 1.11) for men. Among the ethnicities, White ethnicity was  
264 associated with the highest risk in women, with an aOR of 1.57 (95% CI: 1.34 to  
265 1.83). With respect to economic quintiles, women in the 5th quintile exhibited the  
266 greatest risk, with aOR of 1.38 (95% CI: 1.13 to 1.70). In relation to other  
267 determining factors, it was observed that inadequate disposal of excreta had  
268 significant associations with overweight or obesity in both genders. For women, the  
269 risk was reduced with an adjusted odds ratio (aOR) of 0.86 (95% CI: 0.80 to 0.92),  
270 whereas for men, the reduction in risk was slightly more pronounced with an aOR of  
271 0.81 (95% CI: 0.74 to 0.89). Regular physical activity appeared to be protective  
272 against overweight or obesity. Women who engaged in regular physical activity  
273 presented a reduced risk, as indicated by an aOR of 0.84 (95% CI: 0.80 to 0.88),  
274 whereas men benefitted slightly more from such activity, displaying an aOR of 0.76  
275 (95% CI: 0.70 to 0.83). Notably, in households where processed food labeling was  
276 recognized, understood, and utilized, the risk of overweight or obesity increased in  
277 both women and men. This association, for women, was statistically significant with  
278 an aOR of 1.16 (95% CI: 1.09 to 1.24), and for men, it was not significant (aOR=  
279 1.11; 95% CI: 0.95 to 1.29).



280 **Table 3. Adjusted Odds Ratios of overweight or obesity from each explanatory variable using the parsimonious logistic regression model of Table 2**  
 281 **between women and men.**  
 282

| Variable                                                                                              | Parsimonious model in women<br>aOR (IC95%) | p-value | Parsimonious model in men<br>aOR (IC95%) | p-value |
|-------------------------------------------------------------------------------------------------------|--------------------------------------------|---------|------------------------------------------|---------|
| Age of the child (per each increase in one year)                                                      | 1.09 (1.07 to 1.11)                        | <0.001  | 1.10 (1.09 to 1.11)                      | <0.001  |
| Ethnicity                                                                                             |                                            |         |                                          |         |
| Ethnicity (Indigenous is the ref.)                                                                    | 1                                          | -       | 1                                        | -       |
| Ethnicity (Afroecuadorian)                                                                            | 1.19 (0.82 to 1.72)                        | 0.374   | 1.07 (0.93 to 1.23)                      | 0.325   |
| Ethnicity (Mestizo – mixed ethnic background)                                                         | 1.32 (1.09 to 1.60)                        | 0.005   | 1.01 (0.97 to 1.06)                      | 0.653   |
| Ethnicity (White)                                                                                     | 1.57 (1.34 to 1.83)                        | <0.001  | 1.05 (0.64 to 1.70)                      | 0.858   |
| Ethnicity (Montubio or other)                                                                         | 0.94 (0.67 to 1.32)                        | 0.716   | 0.99 (0.97 to 1.00)                      | 0.196   |
| Economic quintiles by income <sup>a</sup>                                                             |                                            |         |                                          |         |
| Economic quintile by income (1st quintile is the ref.)                                                | 1                                          | -       | 1                                        | -       |
| Economic quintile by income (2nd quintile)                                                            | 1.13 (1.10 to 1.17)                        | <0.001  | 1.19 (1.14 to 1.24)                      | <0.001  |
| Economic quintile by income (3rd quintile)                                                            | 1.27 (0.88 to 1.83)                        | 0.203   | 1.38 (1.32 to 1.44)                      | <0.001  |
| Economic quintile by income (4th quintile)                                                            | 1.31 (1.07 to 1.60)                        | 0.009   | 1.48 (1.26 to 1.73)                      | <0.001  |
| Economic quintile by income (5th quintile)                                                            | 1.38 (1.13 to 1.70)                        | 0.002   | 1.40 (1.33 to 1.48)                      | <0.001  |
| p-for-trend                                                                                           | 1.09 (1.01 to 1.17)                        | 0.021   | 1.10 (1.09 to 1.12)                      | <0.001  |
| Number of people in the household (per each extra person)                                             | 0.92 (0.90 to 0.95)                        | <0.001  | 0.93 (0.88 to 1.00)                      | 0.041   |
| Inadequate disposal of excreta (otherwise is the ref.)                                                | 0.86 (0.80 to 0.92)                        | <0.001  | 0.81 (0.74 to 0.89)                      | <0.001  |
| Regular physical activity (otherwise is the ref.)                                                     | 0.84 (0.80 to 0.88)                        | <0.001  | 0.76 (0.69 to 0.83)                      | <0.001  |
| Consumption of food provided by the school (otherwise is the ref.)                                    | 1.01 (0.98 to 1.05)                        | 0.499   | 0.86 (0.69 to 1.09)                      | <0.001  |
| Family members recognize, understand, and use the labeling of processed foods (otherwise is the ref.) | 1.16 (1.09 to 1.24)                        | <0.001  | 1.11 (0.95 to 1.29)                      | 0.179   |

BDH=Human Development Voucher, by its Spanish spelling

<sup>a</sup> Income quintiles are calculated at the household level using monetary labour income per capita, first calculating the total income for each income earner. This total income includes earnings from work, income from investments, transfers, and other benefits, such as cash social transfers. Once we add all these up, we obtain the total household income. Then, we determine the average income per person (per capita income) by dividing the total household income by the number of people in each household. Subsequently, the population is systematically arranged on the basis of the per capita income variable. The calculation of the quintiles was performed by dividing the population into five equal groups, known as quintiles. The first quintile includes the percentage of households with the lowest income, the second quintile includes the next percentage, and so on until the fifth quintile, which includes the percentage of households with the highest income.

284 After conducting an analysis excluding children in the highest quintile, children with  
285 parents receiving the BDH, and those residing in households with a larger number of  
286 individuals, the observed associations maintained similar trends. However, the  
287 relationships were less statistically significant, as detailed in S3 Table.

## 288 **Discussion**

### 289 **Principle Findings**

290 Increasing age, male gender, mestizo (mixed ethnic background) ethnicity, higher  
291 economic quintiles, inadequate disposal of excreta, and lack of physical activity are  
292 factors associated with a higher likelihood of overweight or obesity in children aged 5  
293 to 11 years in Ecuador. The impact of consuming school-provided meals was  
294 inconclusive. Children from families with a higher number of individuals in the  
295 household and with families that recognize and use processed food labels exhibited a  
296 higher likelihood of being overweight or obese.

### 297 **Comparison with the Literature**

298 The prevalence of OW/OB in school children places the country in the eighth position  
299 in the Americas, following countries such as Mexico, Chile, Panama, and the United  
300 States, and surpassing the prevalences in Colombia and Peru [22]. International data  
301 reported in 2016 ranked the country 15th in the same region [23]. This highlights the  
302 drastic increase in prevalence in the absence of effective public policies, compared  
303 with other countries that have taken strong measures against childhood overweight  
304 and obesity [24,25].

305 The study reveals that children who purchase food at school are at a greater risk of  
306 being overweight or obese than those who consume meals provided by the school, but  
307 this difference is not statistically significant. Despite that, it is important to mention

308 that prior research from the ENSANUT 2018 survey, indicated a link between school  
309 foods, particularly those sold in stores (73%), and elevated BMI [26]. A plausible  
310 explanation is that 60% of these stores provide unhealthy products labeled with a “red  
311 traffic light”. The lack of significant results may stem from the Ecuadorian school  
312 feeding program, which relies on processed and packaged products mandated to bear  
313 nutritional labeling (traffic light system) [1]. These products contain high levels of  
314 sugar, salt, and fats similar to the ultra-processed items distributed by food industries  
315 in formal markets.

316

317 The study underscores the crucial role of the school food environment in addressing  
318 childhood obesity. Despite robust evidence[27], many Latin American schools,  
319 including those in Ecuador[28]. lack effective public health policies. Practical  
320 recommendations include prohibiting the advertisement and sale of processed foods in  
321 and around schools, imposing higher taxes on sugar-rich, ultra-processed products,  
322 and promoting the consumption of fresh fruits and vegetables, along with education  
323 on food labeling[29].

324

325 In a broader epidemiological context, the gradual increase in the prevalence of  
326 OW/OB in the population of this study, along with a population of adults who have  
327 been overweight and obese for decades, coupled with a distribution of excess  
328 malnutrition across all socioeconomic strata in both children and adults [9], places  
329 Ecuador in a second stage of transitioning to obesity. It is noteworthy that the richest  
330 quintile of households has a lower prevalence of OW/OB than the quintile  
331 immediately below, which could indicate that Ecuador is entering the third stage of  
332 transitioning to obesity, where excess malnutrition decreases in wealthier households

333 and becomes concentrated in socioeconomically vulnerable households [5].

334 Additionally, the observation that children residing in homes with inadequate excreta  
335 disposal are less likely to be OW/OB underscores the presence of a socioeconomic  
336 gradient in obesity and overweight prevalence in Ecuador. This characteristic is  
337 compounded by the fact that the country has not overcome malnutrition in early  
338 childhood [9], further complicating the issue of overall malnutrition, resulting in a  
339 country experiencing a double burden of malnutrition (malnutrition due to deficiency  
340 and excess).

341 The prevalence patterns of OW/OB in Ecuadorian school children are similar to those  
342 in other low and middle-income countries in the region. Similar to a study of school  
343 children in Mexico, there is a higher prevalence of OW/OB in boys than in girls, in  
344 the non-indigenous population, and in higher-income households, and OW/OB also  
345 increases with age [30,31]. However, the results of this study differ from patterns seen  
346 in high-income countries in the region such as Chile, where OW/OB is more prevalent  
347 in socioeconomically vulnerable families [32]. It is challenging to compare the  
348 determinants found in this study with those in other countries in the region because of  
349 to the scarcity of published studies [33].

350 The fact that children from households self-identified as mestizo have higher rates of  
351 OW/OB may be explained by the fact that these children tend to live in urban  
352 environments where they are more exposed to obesogenic environments such as  
353 advertisements for sugary beverages, ultra-processed foods, and junk food. This  
354 would also explain why indigenous children are protected from obesity and  
355 overweight, in addition to socioeconomic vulnerabilities in this population, along with  
356 household size, which is more strongly linked to malnutrition due to deficiency rather  
357 than excess in the country [15,34]. Therefore, further research is needed on the

358 circumstances of social vulnerability and food insecurity in households of school  
359 children with OW/OB to explain why certain negative socioeconomic factors seem to  
360 protect against OW/OB.

361 Physical activity among schoolchildren acts as a protective factor against OW/OB  
362 [35,36]. However, the percentage of children in the sample who engage in regular  
363 physical activity is very low, which aligns with previously published findings [37].  
364 There is limited research linking physical activity to excess malnutrition in this group.  
365 Therefore, further research on this topic is necessary.

366  
367 Regarding gender differences, our findings support the current understanding of  
368 gender-based dietary segregation, both in Ecuador and globally. In Ecuador,  
369 prevailing dietary customs, shaped by a patriarchal and sexist societal framework,  
370 often prioritize feeding boys. This may partly account for why physical activity  
371 appears to benefit boys more significantly in reducing the likelihood of being  
372 overweight or obese, as compared to girls, where such activities do not seem to  
373 diminish the probability of overweight or obesity as effectively [38]. This is  
374 exacerbated by the inclination to maintain purely aesthetic standards, which results in  
375 food restrictions for girls, especially as they enter adolescence [39]. Additionally,  
376 there are existing and differential unhealthy exposures based on socioeconomic strata  
377 [40].

378 Given Ecuador's extensive history of childhood chronic malnutrition, a pivotal risk  
379 factor for overweight, obesity, and non-communicable diseases, coupled with the  
380 severe impacts of climate change linked to environmental factors, it is imperative to  
381 focus research and public policies on understanding the global syndemic of

382 malnutrition. This approach should incorporate triple-duty actions, considering the  
383 distinctive aspects of diverse life stages. [41].

384 Our findings suggest that public health policies should place greater focus on  
385 improving the quality of available foods within schools to mitigate the risks of  
386 childhood overweight and obesity.

387 In the context of Ecuador and the wider region, our study underscores the criticality of  
388 scrutinizing policy missteps that deregulate the marketing of unhealthy foods and  
389 other harmful products, thereby hindering the enhancement of food environments.

390 Remarkably, the President of Ecuador enacted Presidential Decree No. 645 on  
391 January 10, 2023, which aims to slash taxes on known health hazards, such as alcohol,  
392 tobacco, sugary beverages, and firearms, in stark contrast to advancing public health  
393 policies [16]. This decree is poised to adversely affect collective health. This  
394 underscores a significant lacuna in public health strategies, potentially exacerbating  
395 the obesity and overweight crisis among school children. This situation urgently  
396 demands the attention of authorities and policymakers to realign regulations with  
397 public health principles, ensuring that economic interests and conflicts of interest do  
398 not undermine the development of sound public health policies [42,43]. In this  
399 context, it becomes imperative for Ecuadorian authorities to implement and  
400 strengthen comprehensive policies that address both the quality of food offered within  
401 schools and those sold in their vicinity.

402 The congruence between the primary and sensitivity analyses bolsters the robustness  
403 of our findings. Although the consumption of food purchased at school and food  
404 provided by the school did not attain statistical significance in the model adjusted for  
405 expansion factors, the overall pattern of results remained consistent. Importantly, the  
406 existing scientific literature supports our findings concerning these variables. It is also

407 crucial to emphasize that there are additional food environments associated with  
408 formal markets and marketing targeted at children, which were not considered in this  
409 study but significantly contribute to childhood OW/OB. Consequently, it is imperative  
410 that national health and nutrition surveys not only possess sensitivity to growth  
411 retardation but also to excess malnutrition. While the study delves into various  
412 sociodemographic factors, some potentially relevant variables, such as cultural  
413 practices or parental education, are not thoroughly examined. It is worth mentioning  
414 that not all information from different forms can be cross-referenced for analysis  
415 because of to variations in the design and objectives of the national survey.  
416 We believe that our findings necessitate authorities to contemplate public policies  
417 aimed at reducing the burden of OW/OB from an early age, thereby diminishing  
418 future disabilities and deaths, which evidently result in heavier economic costs and  
419 social burdens.

420

## 421 **Conclusions**

422 Increasing age, male gender, mestizo (mixed ethnic background) ethnicity, higher  
423 economic quintiles, inadequate disposal of excreta, and lack of physical activity are  
424 factors associated with a higher likelihood of overweight or obesity in children aged 5  
425 to 11 years in Ecuador. The impact of consuming school-provided meals was  
426 inconclusive. Children from families with a higher number of individuals in the  
427 household and with families that recognize and use processed food labels exhibited a  
428 higher likelihood of being overweight or obese. It is imperative for the Ecuadorian  
429 government to implement public policy actions aimed at safeguarding the right to  
430 health of school-age children, addressing both social protection within households and  
431 evidence-based dietary policies for promoting healthy school food environments.

## 432 **Acknowledgements**

433 We extend our sincere gratitude to David Grijalva, an economics student from the  
434 Faculty of Economics at the Pontifical Catholic University of Ecuador, for his  
435 invaluable assistance in the preparation of the tables for this manuscript. Additionally,  
436 we would like to thank Natali Mendoza and Margoth Herrera from the Department of  
437 Sociodemographic Statistics at the National Institute of Statistics and Censuses for  
438 their specific technical guidance on the online database.

## 439 **Author Contribution**

440 **Conceptualization:** Betzabé Tello, Iván Dueñas-Espín, José Ocaña, Paúl García-  
441 Zambrano, Betsabé Enríquez-Moreira.

442 **Data curation:** Betzabé Tello, Iván Dueñas-Espín, José Ocaña

443 **Formal analysis:** Iván Dueñas-Espín

444 **Funding acquisition:** Betzabé Tello

445 **Investigation:** Betzabé Tello, Iván Dueñas-Espín

446 **Methodology:** Betzabé Tello, Iván Dueñas-Espín, José Ocaña

447 **Project administration:** Betzabé Tello

448 **Resources:** Betzabé Tello, Iván Dueñas-Espín, José Ocaña

449 **Software:** Iván Dueñas-Espín, José Ocaña

450 **Supervision:** Betzabé Tello

451 **Validation:** Betzabé Tello, Iván Dueñas-Espín, José Ocaña, Paúl García-Zambrano,  
452 Betsabé Enríquez-Moreira.

453 **Visualization:** Betzabé Tello, Iván Dueñas-Espín

454 **Writing – original draft:** Betzabé Tello, Iván Dueñas-Espín, José Ocaña



455 **Writing – review & editing:** Betzabé Tello, Iván Dueñas-Espín, José Ocaña, Paúl  
456 García-Zambrano, Betsabé Enríquez-Moreira.

## 457 **References**

- 458 1. Popkin BM, Adair LS, Ng SW. Global nutrition transition and the pandemic of  
459 obesity in developing countries. *Nutr Rev.* 2012;70: 3–21. doi:10.1111/j.1753-  
460 4887.2011.00456.x
- 461 2. Popkin BM. Global nutrition dynamics: the world is shifting rapidly toward a  
462 diet linked with noncommunicable diseases1–3. *Am J Clin Nutr.* 2006;84: 289–  
463 298. doi:10.1093/ajcn/84.1.289
- 464 3. Monteiro CA, Moubarac JC, Cannon G, Ng SW, Popkin B. Ultra-processed  
465 products are becoming dominant in the global food system. *Obes Rev.*  
466 2013;14: 21–28. doi:10.1111/obr.12107
- 467 4. Di Cesare M, Sorić M, Bovet P, Miranda JJ, Bhutta Z, Stevens GA, et al. The  
468 epidemiological burden of obesity in childhood: A worldwide epidemic  
469 requiring urgent action. *BMC Med.* 2019;17. doi:10.1186/s12916-019-1449-8
- 470 5. Jaacks LM, Vandevijvere S, Pan A, McGowan CJ, Wallace C, Imamura F, et  
471 al. The obesity transition: stages of the global epidemic. *The Lancet Diabetes  
472 and Endocrinology.* Europe PMC Funders; 2019. pp. 231–240.  
473 doi:10.1016/S2213-8587(19)30026-9
- 474 6. Umer A, Kelley GA, Cottrell LE, Giacobbi P, Innes KE, Lilly CL. Childhood  
475 obesity and adult cardiovascular disease risk factors: A systematic review with  
476 meta-analysis. *BMC Public Health.* 2017;17. doi:10.1186/s12889-017-4691-z
- 477 7. Weihrauch-Blüher S, Schwarz P, Klusmann JH. Childhood obesity: increased  
478 risk for cardiometabolic disease and cancer in adulthood. *Metabolism.* 2019;92:  
479 147–152. doi:10.1016/j.metabol.2018.12.001

- 480 8. Callo Quinte G, Barros F, Gigante DP, De Oliveira IO, Dos Santos Motta JV,  
481 Horta BL. Overweight trajectory and cardio metabolic risk factors in young  
482 adults. *BMC Pediatr.* 2019;19. doi:10.1186/s12887-019-1445-3
- 483 9. Cando F, Diego M, Pozo M. Reportes de la ENSANUT 2018. Volumen No. 3  
484 Antropometría. Inst Nac Estadística y Censos. Quito; 2022. Available: chrome-  
485 e/https://www.ecuadorencifras.gob.ec/documentos/web-  
486 inec/Bibliotecas/Libros/Reportes/Reportes\_ENSANUT\_Vol3\_Antropometria.p  
487 df
- 488 10. Jebeile H, Kelly AS, O'Malley G, Baur LA. Obesity in children and  
489 adolescents: epidemiology, causes, assessment, and management. *Lancet*  
490 *Diabetes Endocrinol.* 2022;10: 351–365. doi:10.1016/S2213-8587(22)00047-X
- 491 11. Avelar Rodriguez D, Toro Monjaraz EM, Ignorosa Arellano KR, Ramirez  
492 Mayans J. Childhood obesity in Mexico: Social determinants of health and  
493 other risk factors. *BMJ Case Rep.* 2018;2018. doi:10.1136/bcr-2017-223862
- 494 12. Corvalán C, Garmendia ML, Jones-Smith J, Lutter CK, Miranda JJ, Pedraza  
495 LS, et al. Nutrition status of children in Latin America. *Obes Rev.* 2017;18: 7–  
496 18. doi:10.1111/obr.12571
- 497 13. Freire WB, Silva-Jaramillo KM, Ramirez-Luzuriaga MJ, Belmont P, Waters  
498 WF. The double burden of undernutrition and excess body weight in Ecuador.  
499 *Am J Clin Nutr.* 2014;100: 1636S-1643S. doi:10.3945/ajcn.114.083766
- 500 14. Abril V, Manuel-Y-Keenoy B, Solà R, García JL, Nessier C, Rojas R, et al.  
501 Prevalence of overweight and obesity among 6- to 9-year-old schoolchildren in  
502 cuenca, ecuador: Relationship with physical activity, poverty, and eating  
503 habits. *Food Nutr Bull.* 2013;34: 388–400. doi:10.1177/156482651303400404
- 504 15. Walrod J, Seccareccia E, Sarmiento I, Pimentel JP, Misra S, Morales J, et al.

- 505 Community factors associated with stunting, overweight and food insecurity: A  
506 community-based mixed-method study in four Andean indigenous  
507 communities in Ecuador. *BMJ Open*. 2018;8. doi:10.1136/bmjopen-2017-  
508 020760
- 509 16. Presidencia de la República del Ecuador. Decreto Ejecutivo 645. 2023.
- 510 17. Von Elm E, Altman DG, Egger M, Pocock SJ, Gøtzsche PC, Vandenbroucke  
511 JP. The Strengthening the Reporting of Observational Studies in Epidemiology  
512 (STROBE) Statement: Guidelines for reporting observational studies. *Bull*  
513 *World Health Organ*. 2007;85: 867–872. doi:10.2471/BLT.07.045120
- 514 18. Mendoza N, Ocaña N, Guano D, Núñez J, Valdivieso K. Documento  
515 Metodológico de la Encuesta Nacional de Salud y Nutrición ( ENSANUT ).  
516 Inst Nac Estadística y Censos. Quito - Ecuador; 2019. Available:  
517 [https://www.ecuadorencifras.gob.ec/documentos/web-](https://www.ecuadorencifras.gob.ec/documentos/web-inec/Estadisticas_Sociales/ENSANUT/ENSANUT_2018/Metodologia)  
518 [inec/Estadisticas\\_Sociales/ENSANUT/ENSANUT\\_2018/Metodologia](https://www.ecuadorencifras.gob.ec/documentos/web-inec/Estadisticas_Sociales/ENSANUT/ENSANUT_2018/Metodologia)  
519 [ENSANUT 2018.pdf](https://www.ecuadorencifras.gob.ec/documentos/web-inec/Estadisticas_Sociales/ENSANUT/ENSANUT_2018/Metodologia)
- 520 19. Ministerio de Salud Pública del Ecuador. Reglamento de Etiquetado de  
521 Alimentos Procesados para Consumo Humano. Registro Oficial Suplemento  
522 Quito - Ecuador: [https://www.controlsanitario.gob.ec/wp-](https://www.controlsanitario.gob.ec/wp-content/uploads/downloads/2016/12/Reglamento-de-Etiquetado-de-Alimentos-procesados-para-consumo-humano.pdf)  
523 [content/uploads/downloads/2016/12/Reglamento-de-Etiquetado-de-Alimentos-](https://www.controlsanitario.gob.ec/wp-content/uploads/downloads/2016/12/Reglamento-de-Etiquetado-de-Alimentos-procesados-para-consumo-humano.pdf)  
524 [procesados-para-consumo-humano.pdf](https://www.controlsanitario.gob.ec/wp-content/uploads/downloads/2016/12/Reglamento-de-Etiquetado-de-Alimentos-procesados-para-consumo-humano.pdf); 2014. Available:  
525 [https://www.controlsanitario.gob.ec/wp-](https://www.controlsanitario.gob.ec/wp-content/uploads/downloads/2014/08/REGLAMENTO-SANITARIO-DE-ETIQUETADO-DE-ALIMENTOS-PROCESADOS-PARA-EL-CONSUMO-HUMANO-junio-2014.pdf)  
526 [content/uploads/downloads/2014/08/REGLAMENTO-SANITARIO-DE-](https://www.controlsanitario.gob.ec/wp-content/uploads/downloads/2014/08/REGLAMENTO-SANITARIO-DE-ETIQUETADO-DE-ALIMENTOS-PROCESADOS-PARA-EL-CONSUMO-HUMANO-junio-2014.pdf)  
527 [ETIQUETADO-DE-ALIMENTOS-PROCESADOS-PARA-EL-CONSUMO-](https://www.controlsanitario.gob.ec/wp-content/uploads/downloads/2014/08/REGLAMENTO-SANITARIO-DE-ETIQUETADO-DE-ALIMENTOS-PROCESADOS-PARA-EL-CONSUMO-HUMANO-junio-2014.pdf)  
528 [HUMANO-junio-2014.pdf](https://www.controlsanitario.gob.ec/wp-content/uploads/downloads/2014/08/REGLAMENTO-SANITARIO-DE-ETIQUETADO-DE-ALIMENTOS-PROCESADOS-PARA-EL-CONSUMO-HUMANO-junio-2014.pdf)
- 529 20. World Health Organization. Growth Reference data for 5-19 years. Available:

- 530 <https://www.who.int/tools/growth-reference-data-for-5to19->  
531 [years/indicators/bmi-for-age](https://www.who.int/tools/growth-reference-data-for-5to19-years/indicators/bmi-for-age)
- 532 21. Harrell FE. Regression Modeling Strategies with applications to linear models,  
533 logistic and ordinal regression and survival analysis. Second. Springer  
534 International Publishing, editor. Journal of Statistical Software. Switzerland;  
535 2015. doi:10.1007/978-3-319-19425-7
- 536 22. World Obesity Federation. Prevalence of child overweight, including obesity  
537 (%). In: Global Obesity Observatory [Internet]. 2023 [cited 26 Sep 2023].  
538 Available: [https://data.worldobesity.org/tables/prevalence-of-child-overweight-](https://data.worldobesity.org/tables/prevalence-of-child-overweight-including-obesity-3/?regionid=3&msr=msr&breakdown=c)  
539 [including-obesity-3/?regionid=3&msr=msr&breakdown=c](https://data.worldobesity.org/tables/prevalence-of-child-overweight-including-obesity-3/?regionid=3&msr=msr&breakdown=c)
- 540 23. Our world in data. Share of children and adolescents that are overweight or  
541 obese, 1975 to 2016. 2022 [cited 26 Sep 2023]. Available:  
542 <https://ourworldindata.org/grapher/child-adolescent-obesity?tab=chart>
- 543 24. Duran AC, Mialon M, Crosbie E, Jensen ML, Harris JL, Batis C, et al. Food  
544 environment solutions for childhood obesity in Latin America and among  
545 Latinos living in the United States. *Obes Rev.* 2021;22. doi:10.1111/obr.13237
- 546 25. Pérez-Escamilla R, Vilar-Compte M, Rhodes E, Sarmiento OL, Corvalan C,  
547 Sturke R, et al. Implementation of childhood obesity prevention and control  
548 policies in the United States and Latin America: Lessons for cross-border  
549 research and practice. *Obes Rev.* 2021;22. doi:10.1111/obr.13247
- 550 26. Weigel MM, Armijos RX. The Ecuadorian School Food Environment:  
551 Association With Healthy and Unhealthy Food and Beverage Consumption and  
552 BMI. *Food Nutr Bull.* 2022;43: 439–464. doi:10.1177/03795721221116447
- 553 27. Hawkes C, Smith TG, Jewell J, Wardle J, Hammond RA, Friel S, et al. Smart  
554 food policies for obesity prevention. *The Lancet.* Elsevier; 2015. pp. 2410–

- 555 2421. doi:10.1016/S0140-6736(14)61745-1
- 556 28. Ministerio de Salud Pública del Ecuador, Ministerio de Educación. Reglamento  
557 de bares escolares del Sistema Nacional de Educación. Ecuador; 2020 pp. 1–1.  
558 Available: [https://www.controlsanitario.gob.ec/wp-content/plugins/download-](https://www.controlsanitario.gob.ec/wp-content/plugins/download-monitor/download.php?id=9565&force=1)  
559 [monitor/download.php?id=9565&force=1](https://www.controlsanitario.gob.ec/wp-content/plugins/download-monitor/download.php?id=9565&force=1)
- 560 29. Temple NJ. A Proposed Strategy against Obesity: How Government Policy  
561 Can Counter the Obesogenic Environment. *Nutrients*. 2023;15.  
562 doi:10.3390/nu15132910
- 563 30. del Monte Vega MY, Ávila Curiel A, Ávila Arcos MA, Galindo Gómez C,  
564 Shamah Levy T. Overweight and obesity in the Mexican school-age population  
565 from 2015 to 2019. *Nutr Hosp*. 2022;39: 1076–1085. doi:10.20960/nh.04028
- 566 31. Shamah-Levy T, Cuevas-Nasu L, Humarán IMG, Morales-Ruán C,  
567 Valenzuela-Bravo DG, Gaona-Pineda EB, et al. Prevalencia y predisposición a  
568 la obesidad en una muestra nacional de niños y adolescentes en México. *Salud*  
569 *Publica Mex*. 2020;62: 725–733. doi:10.21149/11552
- 570 32. Amigo C. H, Bustos P, Erazo M, Cumsille P, Silva C. Factores determinantes  
571 del exceso de peso en escolares: Un estudio multinivel. *Rev Med Chil*.  
572 2007;135: 1510–1518. doi:10.4067/s0034-98872007001200002
- 573 33. Allender S, Owen B, Kuhlberg J, Lowe J, Nagorcka-Smith P, Whelan J, et al.  
574 A community based systems diagram of obesity causes. *PLoS One*. 2015;10:  
575 1–12. doi:10.1371/journal.pone.0129683
- 576 34. Rivadeneira MF, Moncayo AL, Córdor JD, Tello B, Buitrón J, Astudillo F, et  
577 al. High prevalence of chronic malnutrition in indigenous children under 5  
578 years of age in Chimborazo-Ecuador: multicausal analysis of its determinants.  
579 *BMC Public Health*. 2022;22. doi:10.1186/s12889-022-14327-x

- 580 35. Ip P, Ho FKW, Louie LHT, Chung TWH, Cheung YF, Lee SL, et al.  
581 Childhood Obesity and Physical Activity-Friendly School Environments. *J*  
582 *Pediatr.* 2017;191: 110–116. doi:10.1016/j.jpeds.2017.08.017
- 583 36. Yuksel HS, Şahin FN, Maksimovic N, Drid P, Bianco A. School-based  
584 intervention programs for preventing obesity and promoting physical activity  
585 and fitness: A systematic review. *Int J Environ Res Public Health.* 2020;17.  
586 doi:10.3390/ijerph17010347
- 587 37. Andrade S, Ochoa-Avilés A, Freire W, Romero-Sandoval N, Orellana D,  
588 Contreras T, et al. Results from ecuador’s 2018 report card on physical activity  
589 for children and youth. *J Phys Act Heal.* 2018;15: S344–S346.  
590 doi:10.1123/JPAH.2018-0536
- 591 38. Flores J. Soberanía alimentaria y mujeres. Instituto de Estudios Ecuatorianos,  
592 editor. IEE Soberanía Alimentaria y mujeres. Quito; 2013. Available:  
593 [https://www.iee.org.ec/publicaciones/sociedad-alternativa/soberania-](https://www.iee.org.ec/publicaciones/sociedad-alternativa/soberania-alimentaria-y-mujeres.html)  
594 [alimentaria-y-mujeres.html](https://www.iee.org.ec/publicaciones/sociedad-alternativa/soberania-alimentaria-y-mujeres.html)
- 595 39. Wang S, Sun Q, Zhai L, Bai Y, Wei W, Jia L. The prevalence of depression  
596 and anxiety symptoms among overweight/obese and non-overweight/non-obese  
597 children/adolescents in China: A systematic review and meta-analysis. *Int J*  
598 *Environ Res Public Health.* 2019;16. doi:10.3390/ijerph16030340
- 599 40. Isong IA, Rao SR, Bind MA, Avendaño M, Kawachi I, Richmond TK. Racial  
600 and ethnic disparities in early childhood obesity. *Pediatrics.* 2018;141.  
601 doi:10.1542/peds.2017-0865
- 602 41. Venegas Hargous C, Strugnell C, Allender S, Orellana L, Corvalan C, Bell C.  
603 Double- and triple-duty actions in childhood for addressing the global  
604 syndemic of obesity, undernutrition, and climate change: A scoping review.

- 605           Obes Rev. 2023;24. doi:10.1111/obr.13555
- 606    42.    Rogers NT, Cummins S, Forde H, Jones CP, Mytton O, Rutter H, et al.  
607           Associations between trajectories of obesity prevalence in English primary  
608           school children and the UK soft drinks industry levy: An interrupted time series  
609           analysis of surveillance data. PLoS Med. 2023;20: 1–18.  
610           doi:10.1371/journal.pmed.1004160
- 611    43.    Carriedo A, Cairney P, Barquera S, Hawkins B. Policy networks and  
612           competing interests in the development of the Mexican sugar-sweetened  
613           beverages tax. BMJ Glob Heal. 2023;8: 1–15. doi:10.1136/bmjgh-2023-012125  
614

Total Children  $\geq 5$  years old or  
 $\leq 11$  years old  
 $n = 13732$

medRxiv preprint doi: <https://doi.org/10.1101/2023.12.16.23300087>; this version posted December 17, 2023. The copyright holder for this preprint (which was not certified by peer review) is the author/funder, who has granted medRxiv a license to display the preprint in perpetuity.  
It is made available under a [CC-BY 4.0 International license](https://creativecommons.org/licenses/by/4.0/).

Excluded due to missing  
anthropometric measurements  
 $n = 856$

Children with anthropometric  
measurements  
 $n = 12876$

Excluded children with  
stunting or underweight  
 $n = 2069$

Children without stunting  
or underweight and complete data  
 $n = 10807$

**Fig 1. Flowchart showing the study population and selection of study participants**

Figure 1. Flowchart showing the study population and selection of
